# Supplementary material for: Differential regulation of germ line apoptosis and germ cell differentiation by CPEB family members in C. elegans
Source: PubMed Central journal article supplement (PMC5536308; doi:10.1371/journal.pone.0182270), 2017-07-31
Supplement: pone.0182270.s014.pdf [file pone.0182270.s014.pdf]

**A**

| Sample            | Overexpressed<br>(FC > 1.5 & <i>P</i> -value < 0.05) |                                      |                                    | Underexpressed<br>(FC < -1.5 & <i>P</i> -value < 0.05) |                                     |                                     |
|-------------------|------------------------------------------------------|--------------------------------------|------------------------------------|--------------------------------------------------------|-------------------------------------|-------------------------------------|
|                   | Gender neutral                                       | Oogenic                              | Spermatogenic                      | Gender neutral                                         | Oogenic                             | Spermatogenic                       |
| <i>fog-1</i> [L3] | 73/78 (-0.1)<br>$3.1 \times 10^{-1}$                 | 12/10 (0.26)<br>$5.0 \times 10^{-1}$ | 7/7 (0)<br>$8.4 \times 10^{-1}$    | 65/62 (0.07)<br>$6.2 \times 10^{-1}$                   | 8/8 (0)<br>1.0                      | 1/5 (-2.32)<br>$4.1 \times 10^{-2}$ |
| <i>cpb-2</i> [L3] | 25/27 (-0.11)<br>$4.3 \times 10^{-1}$                | 5/3 (0.74)<br>$2.0 \times 10^{-1}$   | 5/3 (0.74)<br>$1.0 \times 10^{-1}$ | 28/27 (0.05)<br>1.0                                    | 1/3 (-1.58)<br>$3.6 \times 10^{-1}$ | 2/3 (-0.58)<br>1.0                  |
| <i>cpb-3</i> [L4] | 46/44 (0.06)<br>$6.7 \times 10^{-1}$                 | 3/6 (-1)<br>$3.7 \times 10^{-1}$     | 1/4 (-2)<br>$1.2 \times 10^{-1}$   | 28/30 (-0.1)<br>$6.0 \times 10^{-1}$                   | 2/4 (-1)<br>$5.8 \times 10^{-1}$    | 4/3 (0.42)<br>$3.5 \times 10^{-1}$  |

**B**

| Sample            | Overexpressed<br>(FC > 1.5 & BH adjusted <i>P</i> -value < 0.01) |                                         |                                         | Underexpressed<br>(FC < -1.5 & BH adjusted <i>P</i> -value < 0.01) |                                         |                                         |
|-------------------|------------------------------------------------------------------|-----------------------------------------|-----------------------------------------|--------------------------------------------------------------------|-----------------------------------------|-----------------------------------------|
|                   | Gender neutral                                                   | Oogenic                                 | Spermatogenic                           | Gender neutral                                                     | Oogenic                                 | Spermatogenic                           |
| <i>fog-1</i> [L3] | 524/927 (-0.82)<br>$< 10^{-10}$                                  | 121/254 (-1.07)<br>$< 10^{-10}$         | 221/354 (-0.68)<br>$< 10^{-10}$         | 1344/965 (0.48)<br>$< 10^{-10}$                                    | 232/265 (-0.19)<br>$2.1 \times 10^{-2}$ | 242/369 (-0.61)<br>$< 10^{-10}$         |
| <i>cpb-2</i> [L3] | 770/768 (0)<br>$9.2 \times 10^{-1}$                              | 136/210 (-0.63)<br>$1.3 \times 10^{-9}$ | 213/294 (-0.46)<br>$1.8 \times 10^{-8}$ | 529/637 (-0.27)<br>$5.8 \times 10^{-9}$                            | 167/175 (-0.07)<br>$5.5 \times 10^{-1}$ | 210/244 (-0.22)<br>$1.4 \times 10^{-2}$ |
| <i>cpb-3</i> [L4] | 288/494 (-0.78)<br>$< 10^{-10}$                                  | 65/135 (-1.05)<br>$< 10^{-10}$          | 107/189 (-0.82)<br>$< 10^{-10}$         | 657/610 (0.11)<br>$1.0 \times 10^{-2}$                             | 381/167 (1.19)<br>$< 10^{-10}$          | 205/233 (-0.18)<br>$3.6 \times 10^{-2}$ |
